# Supplementary material
Source: publisher figshare collection journal article supplement (https://frontiersin.figshare.com/ndownloader/files/14119649)
Supplement: Supplementary file [file 14119649]

## *Supplementary Material*

### **The ability of a lytic staphylococcal podovirus vB\_SauP\_phiAGO1.3 to coexist in an equilibrium with its host facilitates the selection of host mutants of attenuated virulence but does not preclude the phage antistaphylococcal activity in a nematode infection model**

Aleksandra Głowacka-Rutkowska<sup>1</sup>, Agnieszka Gozdek<sup>1</sup>, Joanna Empel<sup>2</sup>, Jan Gawor<sup>3</sup>, Karolina Żuchniewicz<sup>3</sup>, Aleksandra Kozińska<sup>2#</sup>, Janusz Dębski<sup>4</sup>, Robert Gromadka<sup>3</sup>, Małgorzata Łobocka<sup>1, 5\*</sup>

<sup>1</sup>Department of Microbial Biochemistry, Institute of Biochemistry and Biophysics, Polish Academy of Sciences, Warsaw, Poland

<sup>2</sup>Department of Epidemiology and Clinical Microbiology, National Medicines Institute (NMI), Warsaw, Poland

<sup>3</sup>Laboratory of DNA Sequencing and Oligonucleotide Synthesis, Institute of Biochemistry and Biophysics, Polish Academy of Sciences, Warsaw, Poland

<sup>4</sup>Laboratory of Mass Spectrometry, Institute of Biochemistry and Biophysics, Polish Academy of Sciences, Warsaw, Poland

<sup>5</sup>Autonomous Department of Microbial Biology, Faculty of Agriculture and Biology, Warsaw University of Life Sciences, Warsaw, Poland

# Present address: Department of Drug Biotechnology and Bioinformatics, NMI

\* Correspondence: Małgorzata Łobocka: [lobocka@ibb.waw.pl](mailto:lobocka@ibb.waw.pl)

## **1 Supplementary experimental procedures**

### **1.1 Determination of the optimal multiplicity of infection**

Overnight culture of 80wphwpl strain was diluted 1:100 in fresh LB and incubated at 37°C with shaking (200 rpm) until the optical density (OD<sub>600</sub>) of about 0.4. Cells were mixed with phages at different MOIs (100; 10; 1; 0.1; 0.01; 0.001 and 0.0001), left for 15 min at room temperature (RT) without shaking to allow for phage adsorption and incubated for 3.5 h at 37°C with shaking (200 rpm). Next, the cultures were centrifuged (10,000 x g, 10 min, 4°C). Supernatants were filtered

## Supplementary material

through 0.22 µm pore size membranes (MILLEX® GS), immediately diluted, and then titers of phage were determined by the double-layered-agar plate method according to Adams (1959).

### 1.2 Phage adsorption

Phage adsorption experiments were carried out as described previously (Shao and Wang, 2008) with some modifications. Culture of 80wphwpl strain (OD<sub>600</sub> of about 0.4) was infected with phiAGO1.3 at MOI of 0.1 and the mixture was incubated at RT. Samples (1 ml) were taken after 2, 4, 6, 8, 10 and 15 minutes and immediately centrifuged (10,000 x g, 2 min). Supernatants containing unadsorbed phages were filtered through 0.22 µm pore size membranes (MILLEX® GS). Phage titers were then determined by the double-layer agar plate method.

#### 1.1 Determination of phage latent period and burst size

One-step growth experiments were performed to determine the latent period and burst size of phiAGO1.3. Briefly, cells of 80wphwpl culture (10 ml, OD<sub>600</sub> of about 0.4) were harvested by centrifugation (10,000 × g for 5 min) and resuspended in 10 ml of fresh LB. Phages were added at MOI of about 0.1 and allowed to adsorb for 10 min at 37°C. The mixture was centrifuged (10,000 x g, 4 min, RT), resuspended in 10 ml of fresh, prewarmed (37°C) LB and incubated at 37°C with shaking (200 rpm). Samples were taken at 2-min intervals (up to 60 min), immediately diluted, and then titers of phage were determined by the double-layer agar plate method.

#### 1.2 Determination of phage stability at different temperatures and different pH

For thermostability testing, 1 ml of phage-containing lysate (10<sup>7</sup> PFU/ml) was incubated at different temperatures (37, 50, 60, 70°C) for 5, 15, 40, 60 min, and titrated immediately using the double-layer agar plate method. For phage stability testing at different pH, phage-containing lysate (10<sup>9</sup> PFU/ml) was diluted 1:100 in LB medium of pH ranging from 3 to 11 (adjusted with 1 M HCl or 1 M NaOH) incubated for 1 h at 37°C, and titrated using the double-layer agar plate method.

#### 1.5 Identification of virion proteins

Phage suspension (10<sup>11</sup> PFU/ml) in phosphate buffer saline (PBS: 10 mM Na<sub>2</sub>HPO<sub>4</sub>, 137 mM NaCl, 2.7 mM KCl, 2 mM KH<sub>2</sub>PO<sub>4</sub> at pH 7.4). was loaded on a block gradient of CsCl (CsCl densities: 1.3, 1.5, 1.7 g/ml in PBS) and centrifuged in TH-641 Swinging Bucket Rotor (Thermo Scientific) at 22 000 rpm, at 4°C for 2 h. The band located between CsCl densities 1.3 and 1.5 g/ml was collected and used as a source of virion proteins. Peptides of whole phiAGO1.3 virions were identified at the Laboratory of Mass Spectrometry of IBB PAS, following tryptic digestion of phiAGO1.3 virion proteins as described elsewhere (Szczepankowska et al., 2017). The analysis was performed with virions from two independently prepared samples. Predicted peptides of all six ORFs of phiAGO1.3 genome were used to search for matching hits.

## 2 Supplementary Figures and Tables

### 2.1 Tables

**Supplementary Table 1.** *Staphylococcus* sp. strains other than *S. aureus* used in this study. Collection numbers of deposits, used to determine the genomic sequence of particular strain are bolded.

| <i>Staphylococcus</i> species                                      | DSM no.     | Other collection no.                                          | Coagulase | NCBI acc. no.     |
|--------------------------------------------------------------------|-------------|---------------------------------------------------------------|-----------|-------------------|
| <i>Staphylococcus delphini</i>                                     | 20771       | ATCC 49171                                                    | plus      |                   |
| <i>Staphylococcus intermedius</i>                                  | 20373       | ATCC 29663, CCM 5739, <b>NCTC 11048</b>                       | plus      | UHDP00000000.1    |
| <i>Staphylococcus pseudintermedius</i>                             | 21284       | <b>CCUG 49543</b> , CIP 108864, LMG 22219                     | plus      | NZ_PPRB00000000.1 |
| <i>Staphylococcus hyicus</i>                                       | 17421       | CIP 64.51                                                     | plus      |                   |
| <i>Staphylococcus hyicus</i>                                       | 20459       | <b>ATCC 11249</b> , CCM 2368, NCTC 10350                      | plus      | NZ_CP008747.1     |
| <i>Staphylococcus saprophyticus</i><br>subsp. <i>bovis</i>         | 18669       | CCM 4410, CCUG 36975, <b>CCUG 38042</b> , CIP 105260          | plus      | NZ_PPRA00000000.1 |
| <i>Staphylococcus saprophyticus</i><br>subsp. <i>saprophyticus</i> | 20229       | ATCC <b>15305</b> , CCM 883, NCIB 8711, NCTC 7292, WDCM 00159 | plus      | NZ_MTGA00000000.1 |
| <i>Staphylococcus schleiferi</i> subsp. <i>coagulans</i>           | <b>6628</b> | ATCC 49545, CIP 104370, JCM 7470                              | plus      | NZ_PPQN00000000.1 |
| <i>Staphylococcus lugdunensis</i>                                  | 4804        | ATCC 43809                                                    | minus     |                   |
| <i>Staphylococcus epidermidis</i>                                  | 20044       | <b>ATCC 14990</b> , CCM 2124, WDCM 111022                     | minus     | NZ_NARC00000000.1 |
| <i>Staphylococcus caprae</i>                                       | 20608       | ATCC 35538, CCM 3573                                          | minus     |                   |
| <i>Staphylococcus chromogenes</i>                                  | 20454       | ATCC 43764, CCM 3387, <b>NCTC 10530</b>                       | minus     | NZ_PPQK00000000.1 |

## Supplementary material

**Supplementary Table 2.** Homologies of phiAGO1.3 proteins to proteins of related phages infecting *S. aureus* (% coverage/% identity). The closest homologs of respective phiAGO1.3 proteins are highlighted. The NCBI accession numbers of phage genomic sequences are the following: NC\_004678.1 (44AHJD), NC\_023550.1 (GRCS), AY954949.1 (66), NC\_009875.1 (SAP-2), AB626963.1 (S13'), NC\_031046.1 (BP39), NC\_031008.1 (SLPW), KY000084.1 (SCH1), NC\_016565.1 (S24-1), AF513033.1 (68), HF937074.1 (PSa3). Phage phiAGO1.9, which is nearly identical to phiAGO1.3 (Gozdek et al., 2018) and phage SCH111 (GenBank acc. no. KY000084), which differs from SCH1 only by 3 nucleotide residues are not included. Phages St 134 and Andhra, which infect *S. epidermidis* and are more distant relatives of phiAGO1.3 than other phages in the Table, are not included. Virion proteins are marked by an asterisk (see Supplementary Table 3). Names of representative subgroup I phages are underlined.

| phiAGO1.3<br>ORF no. | Known or<br>predicted<br>function | Phage         |         |                 |        |        |        |                   |        |        |           |         |
|----------------------|-----------------------------------|---------------|---------|-----------------|--------|--------|--------|-------------------|--------|--------|-----------|---------|
|                      |                                   | <u>44AHJD</u> | GRCS    | <u>66</u>       | SAP-2  | S13'   | BP39   | SLPW              | SCH1   | S24-1  | <u>68</u> | PSa3    |
| 1*                   |                                   | 100/96        | 100/96  | 100/96          | 100/95 | 100/95 | 100/97 | 100/97            | 100/96 | 100/96 | 100/97    | 100/92  |
| 2                    | 100/100                           | 87/100        | 81/100  | 87/100          | 77/100 | 88/100 | 95/100 | 90/100            | 94/100 | 95/100 | 86/100    | 79/100  |
| 3                    |                                   | 97/100        | 93/100  | 96/100          | 94/100 | 97/100 | 96/100 | 95/100            | 98/100 | 98/98  | 98/100    | 97/100  |
| 4                    |                                   | 97/100        | 86/100  | 100/100         | 42/100 | 91/100 | 42/100 | 42/100            | 42/100 | 90/100 | 97/100    | 98/100  |
| 5                    |                                   | 51/100        | 67/100  | 77/100          | 85/100 | 75/100 | 42/100 | -                 | 83/100 | 73/100 | 51/100    | -       |
| 6                    |                                   | 93/100        | 93/100  | 93/100          | 85/100 | 73/100 | 89/100 | 87/100            | 91/100 | 89/100 | 93/100    | 93/100  |
| 7*                   |                                   | 94/100        | 76/95   | 93/100          | 76/95  | 96/100 | 96/100 | 54/100 <br>100/26 | 96/100 | 97/100 | 93/100    | 95/95   |
| 8                    |                                   | 97/91         | 92/100  | 97/100          | 99/91  |        | 99/100 | 98/100            | 99/100 | 98/100 |           | 98/100  |
| 9                    |                                   | 96/99         | 96/100  | 95/100          | 97/100 | 95/100 | 95/99  | 97/100            | 97/100 | 96/100 | 96/99     | 96/100  |
| 10*                  | PlyCA, tail<br>lysin              | 93/100        | 96/100  | 93/100          | 96/100 | 96/100 | 76/100 | 92/100            | 96/100 | 96/100 | 93/100    | 92/100  |
| 11                   | holin                             | 93/100        | 98/100  | 93/100          | 93/100 | 98/100 | 95/100 | 98/100            | 100/38 | 99/100 | 93/100    | 96/100  |
| 12*                  | tail-knob                         | 98/100        | 99/100  | 97/100          | 97/100 | 98/100 | 97/100 | 98/100            | 98/100 | 98/100 | 98/100    | 98/100  |
| 13*                  | tail fiber                        | -             | 84/100  | 81/42 <br>31/57 | 80/57  | 63/100 | 76/100 | 77/42 <br>33/57   | 65/100 | 54/100 | 65/100    | 57/100  |
| 14                   | amidase                           | 90/100        | 91/100  | 90/100          | 92/100 | 88/100 | 91/100 | 89/100            | 82/100 | 88/100 | 90/100    | 95/100  |
| 15*                  | RBP                               | 96/100        | 96/100  | 96/100          | 94/100 | 95/99  | 68/100 | 95/99             | 94/100 | 69/100 | 96/100    | 96/100  |
| 16*                  | lower collar                      | 97/100        | 98/100  | 97/100          | 94/98  | 94/100 | 94/100 | 95/100            | 94/100 | 94/100 | 97/100    | 98/100  |
| 17*                  | uper collar                       | 93/76         | 100/100 | 99/100          | 98/76  | 93/100 | 98/100 | 93/100            | 93/100 | 93/100 | 93/79     | 99/100  |
| 18*                  | capsid                            | 95/100        | 96/100  | 95/100          | 97/100 | 91/98  | 94/98  | 91/98             | 91/98  | 91/98  | 95/100    | 98/100  |
| 19*                  |                                   | 95/100        | 98/100  | 95/100          | 98/100 | 95/100 | 95/100 | 97/100            | 95/100 | 95/100 | 95/100    | 100/100 |
| 20*                  |                                   | 84/100        | 86/100  | 81/100          | 83/100 | 82/100 | 80/100 | 72/100            | 65/100 | 78/100 | 84/100    | 93/100  |

## Supplementary material

**Supplementary Table 3.** Virion proteins of phiAGO1.3 identified by mass spectrometry after tryptic digestion of whole virions

| Protein ID | ORF # | ORF start | ORF end | Strand | No. of AA residues | M.W. kDa | No. of matching peptides | Sequence coverage (%) | Mascot score | pI   | Known/predicted function | 44AHJD (Identity in %) |
|------------|-------|-----------|---------|--------|--------------------|----------|--------------------------|-----------------------|--------------|------|--------------------------|------------------------|
| AUS03367.1 | 1     | 445       | 747     | +      | 100                | 11.61    | 1/1                      | 10/9                  | 37/37        | 4.04 | Hypothetical protein     | ORF2 (96)              |
| AUS03373.1 | 7     | 2202      | 2684    | +      | 160                | 19.48    | 29/31                    | 61/47                 | 977/935      | 7.08 | Hypothetical protein     | ORF8 (94)              |
| AUS03376.1 | 10    | 6394      | 7824    | -      | 476                | 51.98    | 51/63                    | 31/31                 | 1874/2169    | 8.31 | Tail lysin               | ORF11 (93)             |
| AUS03378.1 | 12    | 8223      | 9986    | -      | 587                | 68.50    | 40/40                    | 19/19                 | 1439/1326    | 5.74 | Major tail protein       | ORF13 (98)             |
| AUS03379.1 | 13    | 10042     | 10938   | -      | 298                | 33.93    | 72/86                    | 47/58                 | 2710/2845    | 5.32 | Minor tail protein       | absent                 |
| AUS03381.1 | 15    | 11767     | 13704   | -      | 645                | 74.45    | 80/94                    | 37/39                 | 3143/3234    | 5.33 | Receptor bindin protein  | ORF17 (96)             |
| AUS03382.1 | 16    | 13718     | 14473   | -      | 251                | 29.17    | 7/7                      | 5/5                   | 222/200      | 5.03 | Lower collar protein     | ORF18 (97)             |
| AUS03383.1 | 17    | 14466     | 15449   | -      | 327                | 37.91    | 44/45                    | 23/23                 | 1630/1547    | 4.99 | Upper collar protein     | ORF19 (99)             |
| AUS03384.1 | 18    | 15464     | 16690   | -      | 408                | 46.92    | 76/87                    | 46/50                 | 3388/3512    | 5.35 | Major capsid protein     | ORF20 (95)             |
| AUS03385.1 | 19    | 16697     | 16879   | -      | 59                 | 6.81     | 69/90                    | 83/100                | 3676/4108    | 4.38 | Hypothetical protein     | ORF21 (95)             |
| AUS03386.1 | 20    | 16892     | 17263   | -      | 123                | 14.16    | 60/112                   | 51/60                 | 2863/4596    | 3.62 | Hypothetical protein     | ORF22 (84)             |

\*Two independent samples were used for the analysis. Values obtained with each of the two samples are separated by "/".

## 2.2 Supplementary Figures

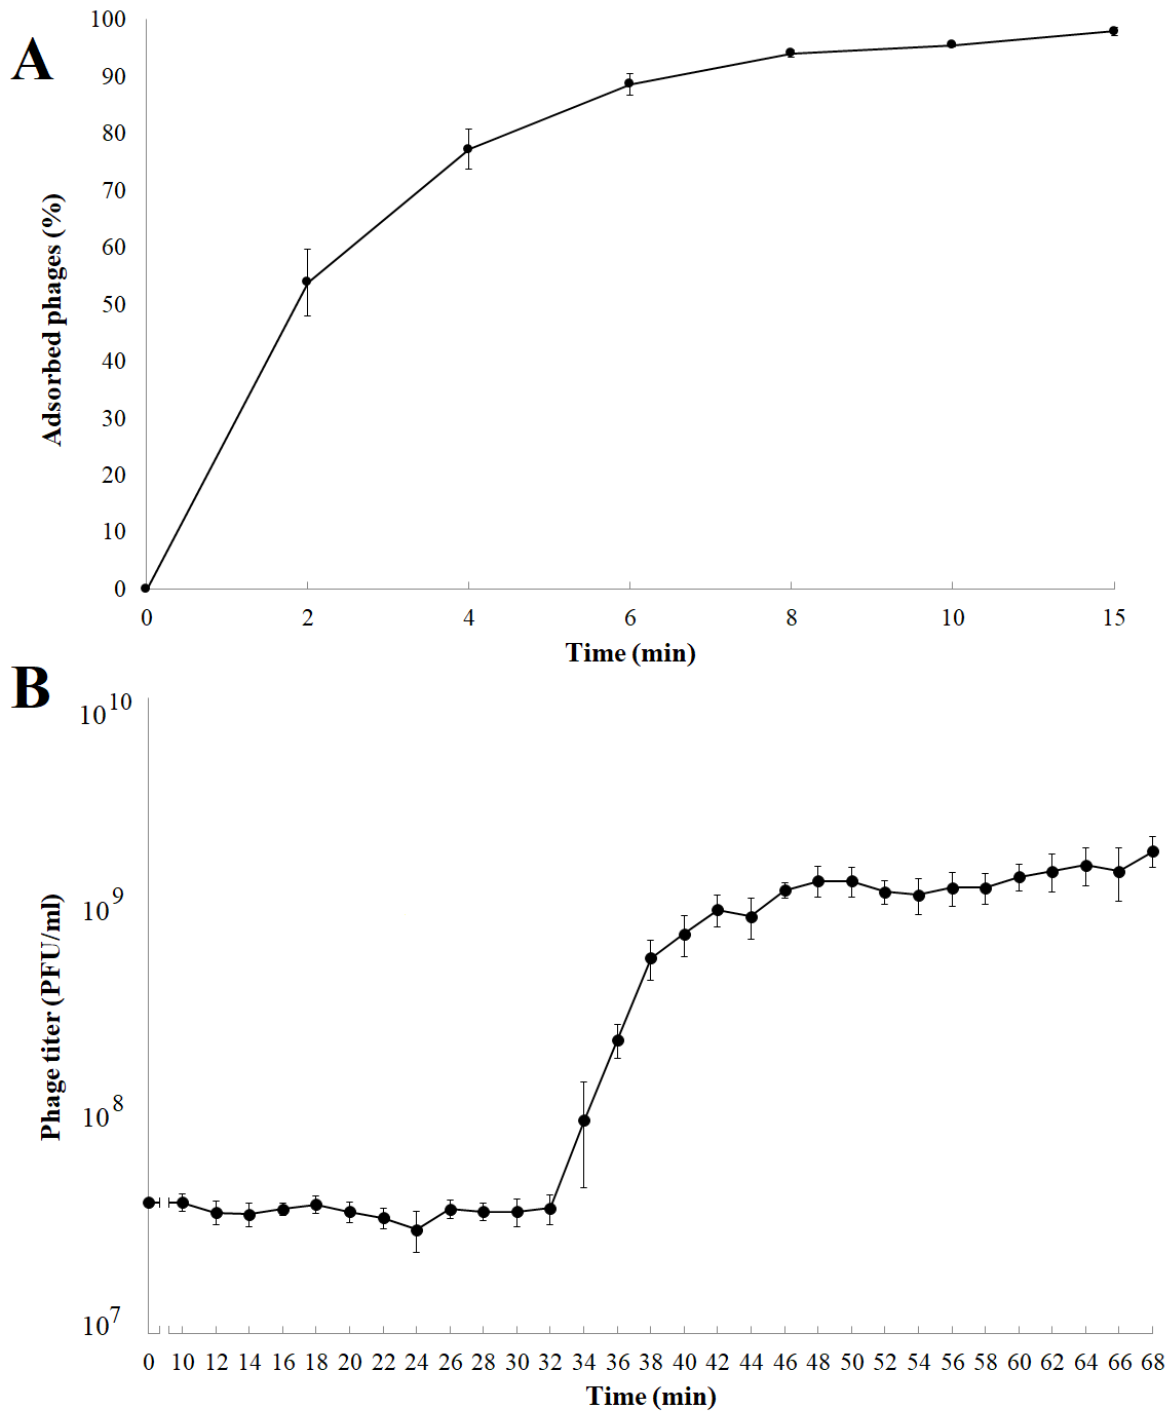

**Supplementary Figure 1. (A)** Adsorption rate and **(B)** one-step growth curve of phage phiAGO1.3. *S. aureus* strain 80wphwpl was used as phage host. Cultures for the measurements were grown at 37°C. Points on each curve represent average values from three independent experiments.

## Supplementary material

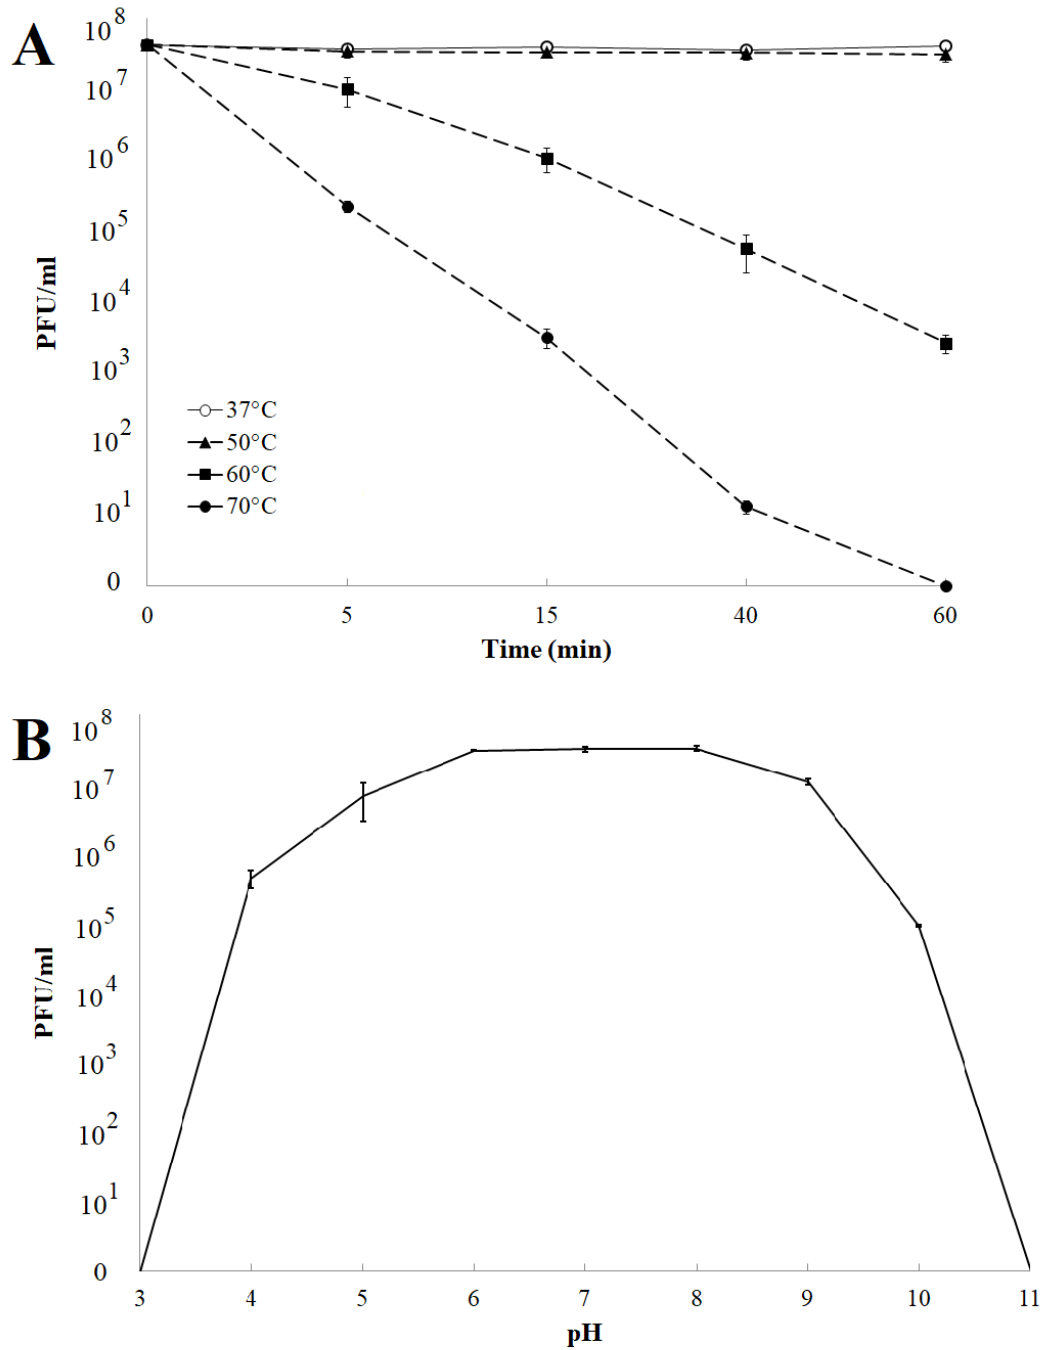

**Supplementary Figure 2.** Stability of phage phiAGO1.3 at different temperatures **(A)** and at different pHs **(B)**. The influence of pH on phage infectivity was assayed after one hour incubation at given pH. Each point in either curve represents the average measurement from three independent experiments.

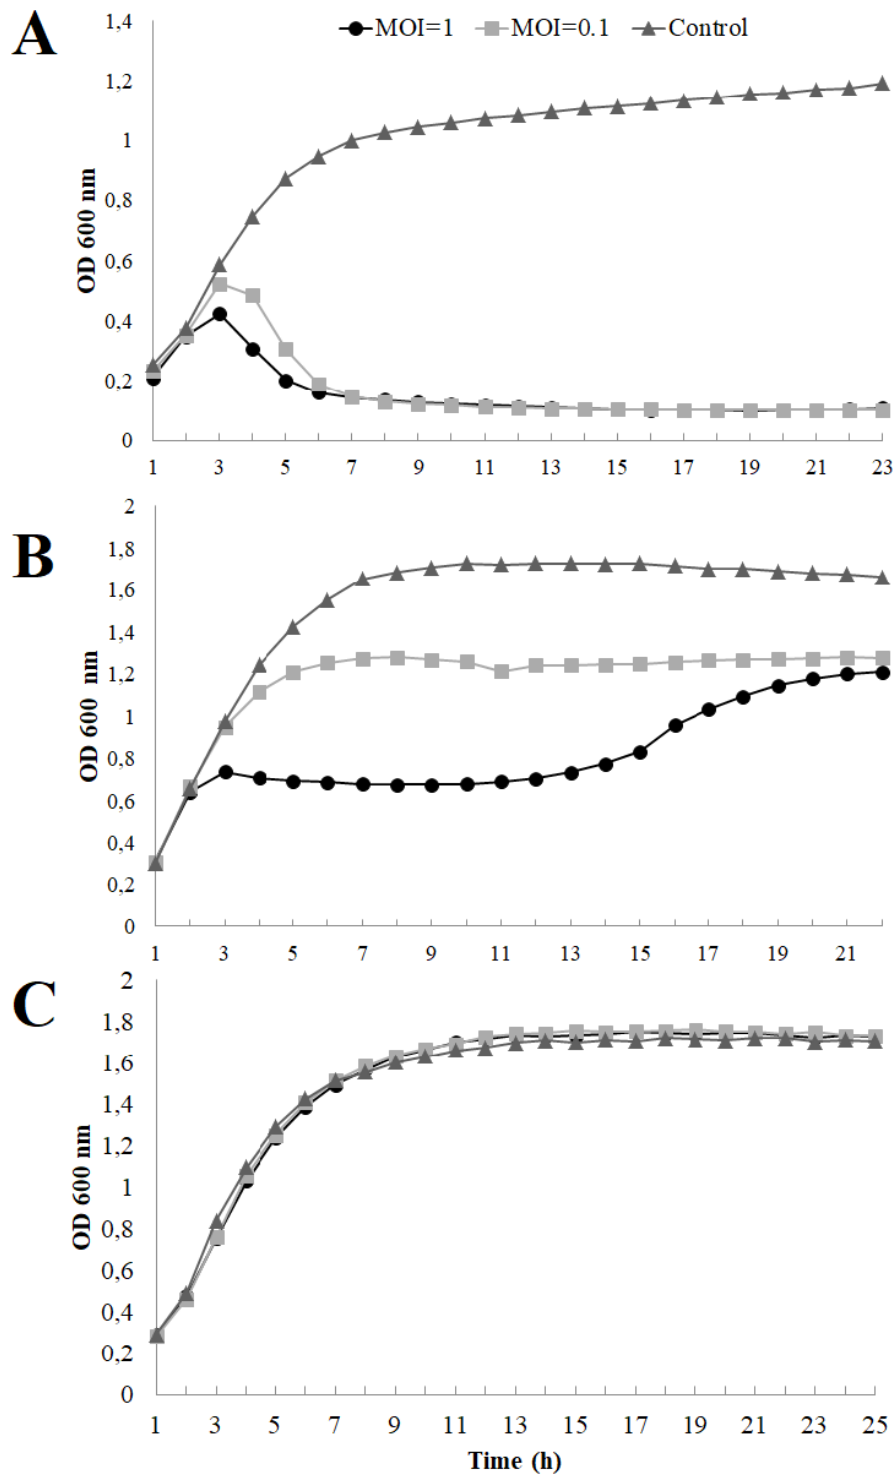

**Supplementary Figure 3.** Exemplary patterns of optical density changes of *S. aureus* cell cultures of various strains upon addition of phiAGO1.3. **(A)** Complete lysis, strain 3008/05. **(B)** Partial lysis, strain 3009/07. **(C)** Lack of lysis, strain 1330/05.



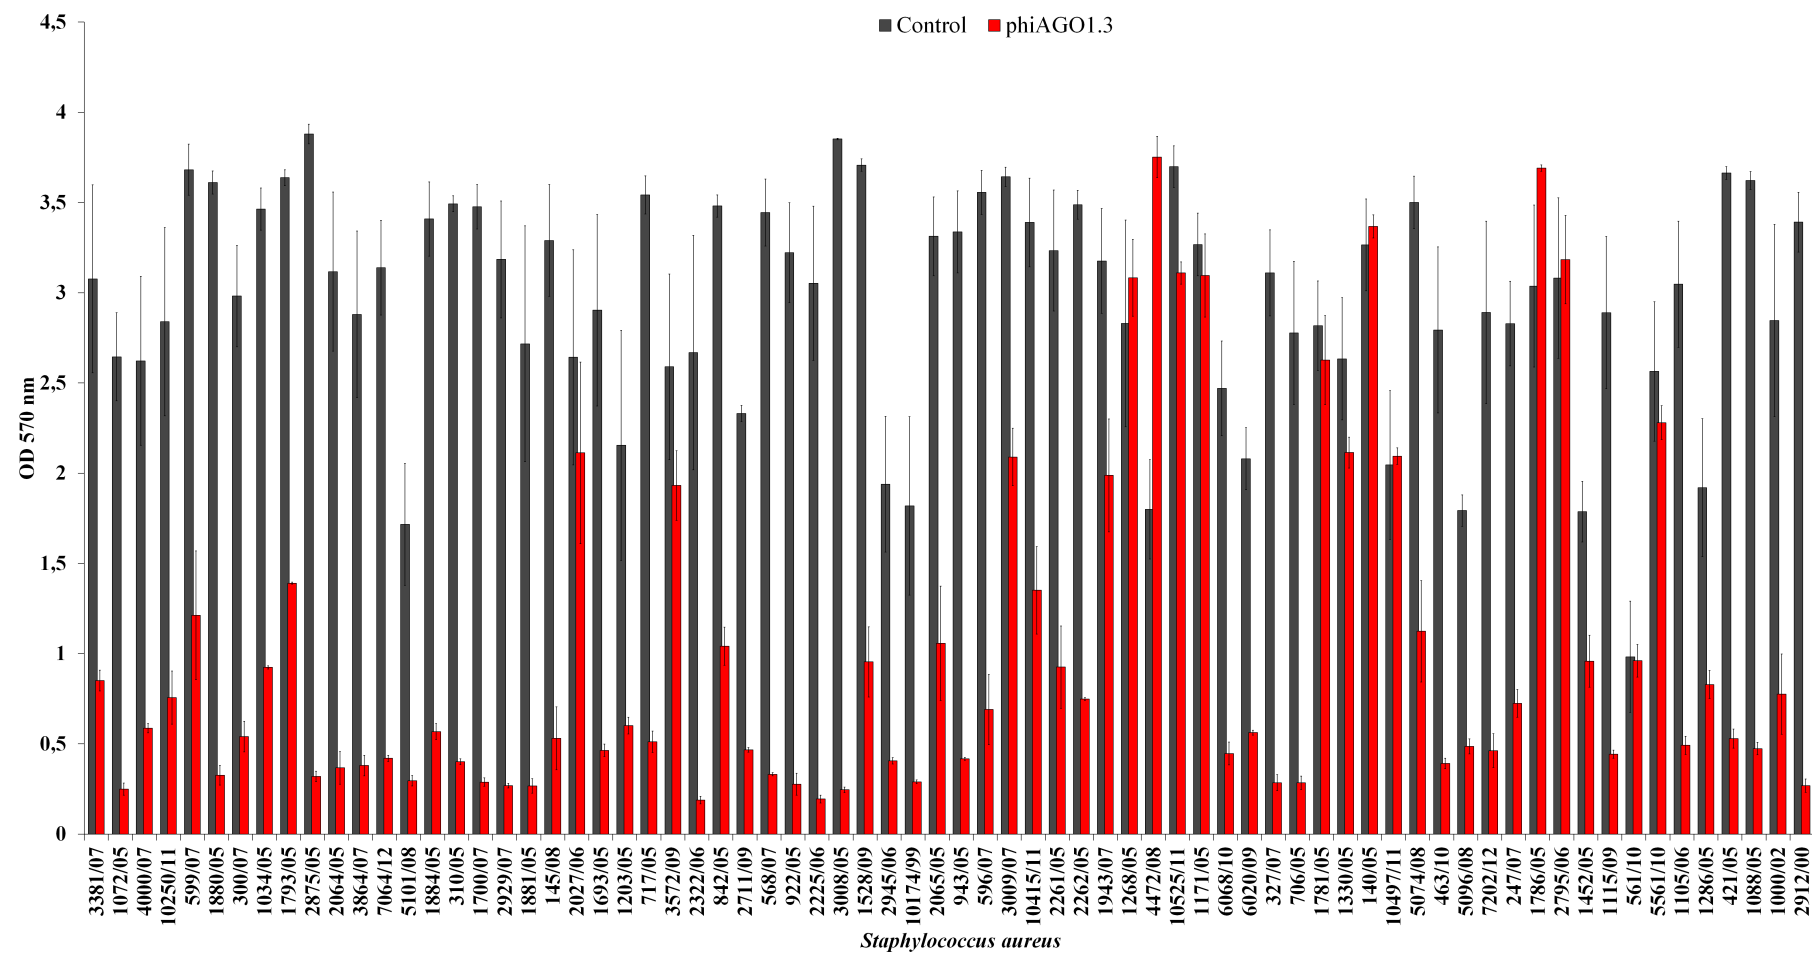

**Supplementary Figure 4.** Activity of phiAGO1.3 in the biofilm disruption of various *S. aureus* strains.

### 3 Supplementary References

Adams, M. H. (1959). *Bacteriophages*. New York: Interscience Publishers

Shao, Y., and Wang, I. N. (2008). Bacteriophage adsorption rate and optimal lysis time. *Genetics*. 180, 471-82. doi: 10.1534/genetics.108.090100

Szczepankowska, A. K., Szatraj, K., Sałański, P., Rózga, A., Górecki, R. K., and Bardowski, J. K. (2017). Recombinant *Lactococcus lactis* expressing haemagglutinin from a Polish avian H5N1 isolate and its immunological effect in preliminary animal trials. *Biomed. Res. Int.* 6747482. doi: 10.1155/2017/6747482
